# Supplementary material for: Behindertenspezifische Herausforderungen bei der pflegerischen Versorgung von contergangeschädigten Menschen – eine Bedarfsanalyse
Source: Atypon-hosted journal article supplement (doi:10.1024/1012-5302/a000670), 2019-03-19
Supplement: 1012-5302_a000670_esm1.pdf [file 1012-5302_a000670_esm1.pdf]

---

## **Pflegerische Versorgung und Pflegebedarf im Sinne der Pflegeversicherung**

---

*Die Pflegeversicherung finanziert folgende Leistungen: Hilfe bei der Körperpflege, Nahrungsaufnahme, Mobilität und hauswirtschaftliche Versorgung. Die Mobilität muss im Zusammenhang stehen mit Pflegehandlungen, wie z.B. Aufstehen, zu Bett gehen, in den Rollstuhl setzen, oder aber mit Begleitung zu medizinisch-therapeutischen Maßnahmen.*

### **27. Besteht bei Ihnen ein solcher Pflegebedarf?**

- Ja       Nein

**Falls ja**, seit wann?

- Seit weniger als 2 Jahren  
 Seit 2 bis 5 Jahren  
 Seit über 5 Jahren

### **28. Werden Sie stationär gepflegt?**

- Ja       Nein

**Falls ja**, seit wann?

- Seit weniger als 2 Jahren  
 Seit 2 bis 5 Jahren  
 Seit über 5 Jahren

### **29. Bekommen Sie Leistungen der Pflegeversicherung?**

- Ja       Nein

### **30. Welcher Pflegestufe gehören Sie an?**

- Pflegestufe 0  
 Pflegestufe I  
 Pflegestufe II  
 Pflegestufe III

**31. Welche monatlichen Zahlungen aus der Pflegeversicherung erhalten Sie?**

- unter 500€
- 500 bis 999€
- 1.000 bis 1.499€
- 1.500 bis 2.000€
- mehr als 2.000€

**32. Wer ist an der Pflege beteiligt? (Mehrfachnennungen möglich)**

- |                                                |                                                       |
|------------------------------------------------|-------------------------------------------------------|
| <input type="checkbox"/> Eltern                | <input type="checkbox"/> Ehepartner / Lebensgefährten |
| <input type="checkbox"/> Freunde/Nachbarn      | <input type="checkbox"/> Kinder                       |
| <input type="checkbox"/> Geschwister           | <input type="checkbox"/> Assistent                    |
| <input type="checkbox"/> Ambulante Dienste     | <input type="checkbox"/> Sonstige Angehörige          |
| <input type="checkbox"/> Zivildienstleistender | <input type="checkbox"/> Sonstige Dritte              |

**33. Besteht durch die conterganbedingte Schädigung ein Pflegebedarf, der von der Pflegeversicherung oder anderen Kostenträgern nicht abgedeckt wird?**

- Ja (→ Bitte weiter mit Frage 34)     Nein

**34. In welcher Höhe schätzen Sie die zusätzliche Belastung jährlich ein?**

- |                                           |                                            |
|-------------------------------------------|--------------------------------------------|
| <input type="checkbox"/> unter 1.500€     | <input type="checkbox"/> 5.000 bis 10.000€ |
| <input type="checkbox"/> 1.500 bis 2.499€ | <input type="checkbox"/> mehr als 10.000€  |
| <input type="checkbox"/> 2.500 bis 4.999€ |                                            |

**Quelle:** Peters KM, Albus C, Lungen M, Niecke A, Pfaff H, Samel C. Gesundheitsschäden, psychosoziale Beeinträchtigungen und Versorgungsbedarf von contergangeschädigten Menschen aus Nordrhein-Westfalen in der Langzeitperspektive: Forschungsbericht. Studie im Auftrag des Landesentrums Gesundheit Nordrhein-Westfalen (LZG.NRW) 2015
